# Supplementary material
Source: PubMed Central journal article supplement (PMC7666106)
Supplement: NIHMS1626667-supplement-Online_Supplement.pdf [file NIHMS1626667-supplement-Online_Supplement.pdf]

## **DATA SUPPLEMENT**

### **Title: Association of Albuminuria Levels with the Prescription of Renin-Angiotensin System Blockade**

#### **Authors:**

Yao Qiao, MPH (1, 2); Jung-Im Shin, MD, PhD (1, 2); Teresa K. Chen, MD, MHS (2, 3); Yingying Sang, MS (1, 2); Josef Coresh, MD (1, 2); Joseph A Vassalotti, MD (4); Alex R. Chang, MD, MS (5); Morgan E. Grams, MD, PhD (1, 2, 3)

#### **Affiliations:**

- (1) Johns Hopkins University Bloomberg School of Public Health, Johns Hopkins University, Baltimore, Maryland
- (2) Welch Center for Prevention, Epidemiology and Clinical Research, Johns Hopkins University, Baltimore, Maryland
- (3) Johns Hopkins University Department of Internal Medicine, Division of Nephrology, Baltimore, Maryland
- (4) Icahn School of Medicine at Mount Sinai, New York, New York
- (5) Division of Nephrology, Geisinger Health System, Danville, Pennsylvania

#### **Corresponding Author:**

Morgan E. Grams MD, PhD,  
Department of Medicine,  
The Johns Hopkins University,  
2024 E. Monument St., Baltimore, MD 21205  
Email: [mgrams2@jhmi.edu](mailto:mgrams2@jhmi.edu)  
Phone: 443-287-1827

Running title: Albuminuria level and RAAS blockade prescription

The supplement contains the following contents:

- Table S1. International Classification of Disease, 9th and 10th Editions, Clinical Modification (ICD-9-CM, ICD-10-CM) Used to Define Disease Conditions
- Table S2. Characteristics of the patient cohort who received urine PCR measurement
- Table S3. Characteristics of the patient cohort who received urine dipstick measurement
- Figure S1. Derivation of study cohort
- Figure S2. Distribution of PCR stratified by ACE-I/ARB initiation within six months of the PCR test among individuals not on ACE-I/ARB at the time of the test (N=9,667), displayed on a log scale
- Figure S3. Association between PCR and initiation of ACE-I/ARB among individuals not on ACE-I/ARB at the time of the PCR test (N=9,667)

**Table S1. International Classification of Disease, 9th and 10th Editions, Clinical Modification (ICD-9-CM, ICD-10-CM) Used to Define Disease Conditions**

| <b>Disease condition</b> | <b>ICD-9-CM codes</b>                                                                                                                                                                                                                                                                                                                                               | <b>ICD-10-CM codes</b>               |
|--------------------------|---------------------------------------------------------------------------------------------------------------------------------------------------------------------------------------------------------------------------------------------------------------------------------------------------------------------------------------------------------------------|--------------------------------------|
| Diabetes                 | 250.x                                                                                                                                                                                                                                                                                                                                                               | E10.x, E11.x, E13.x                  |
| Congestive heart failure | 428.x                                                                                                                                                                                                                                                                                                                                                               | I50.x                                |
| Myocardial infarction    | 410.00, 410.0, 410.01, 410.02,<br>410.1, 410.10, 410.11, 410.12,<br>410.20, 410.2, 410.21,<br>410.22, 410.30, 410.31, 410.32,<br>410.40, 410.4, 410.41, 410.42,<br>410.50, 410.51, 410.52,<br>410.60, 410.61, 410.62, 410.7,<br>410.70, 410.71, 410.72, 410.8,<br>410.80, 410.81, 410.82,<br>410.9, 410.90, 410.91, 410.92,<br>411.0, 412, 429.7, 429.71,<br>429.79 | I24.1, I25.2, I51.0, I21.x-<br>I23.x |
| Hypertension             | 401.x-405.x                                                                                                                                                                                                                                                                                                                                                         | I10.x-I16.x                          |

**Table S2. Characteristics of the patient cohort who received urine PCR measurement**

| Patient characteristics                          | Overall          | Baseline use of ACE-I/ARB |              |             |
|--------------------------------------------------|------------------|---------------------------|--------------|-------------|
|                                                  |                  | Yes                       | No           |             |
| <b>Total number, N</b>                           | 20104            | 10437                     | 9667         |             |
| <b>Urine PCR, median (IQR), mg/g</b>             | 110 (68-260)     | 116 (70-290)              | 100 (60-220) |             |
| <b>Age, mean (SD), years</b>                     | 64.2 (16.5)      | 67.4 (13.9)               | 60.8 (18.3)  |             |
| <b>Systolic blood pressure, mean (SD), mmHg</b>  | 130.8 (17.9)     | 132.9 (18.3)              | 128.4 (17.2) |             |
| <b>Potassium, mean (SD), mEq/L</b>               | 4.3 (0.4)        | 4.3 (0.4)                 | 4.2 (0.4)    |             |
| <b>eGFR, mean (SD), mL/min/1.73m<sup>2</sup></b> | 61.1 (28.0)      | 57.2 (24.9)               | 65.2 (30.5)  |             |
| <b>Female sex, N (%)</b>                         | 11305 (56.2)     | 5473 (52.4)               | 5832 (60.3)  |             |
| <b>Black race, N (%)</b>                         | 475 (2.4)        | 237 (2.3)                 | 238 (2.5)    |             |
| <b>Diabetes, N (%)</b>                           | 6710 (33.4)      | 4740 (45.4)               | 1970 (20.4)  |             |
| <b>Congestive heart failure, N (%)</b>           | 2986 (14.9)      | 1860 (17.8)               | 1126 (11.7)  |             |
| <b>Hypertension, N (%)</b>                       | 15940 (79.3)     | 10008 (95.9)              | 5932 (61.4)  |             |
| <b>Myocardial infarction, N (%)</b>              | 1874 (9.3)       | 1247 (12.0)               | 627 (6.5)    |             |
| <b>Thiazide diuretics, N (%)</b>                 | 4966 (24.7)      | 3441 (33.0)               | 1525 (15.8)  |             |
| <b>Calcium channel blockers, N (%)</b>           | 5254 (26.1)      | 3340 (32.0)               | 1914 (19.8)  |             |
| <b>Beta blockers, N (%)</b>                      | 9246 (46.0)      | 5645 (54.1)               | 3601 (37.3)  |             |
| <b>Statin, N (%)</b>                             | 10128 (50.4)     | 6603 (63.3)               | 3525 (36.5)  |             |
| <b>Calendar year, N (%)</b>                      |                  |                           |              |             |
|                                                  | <b>2004-2008</b> | 2583 (12.9)               | 1232 (11.8)  | 1351 (14.0) |
|                                                  | <b>2009-2013</b> | 7493 (37.3)               | 3798 (36.4)  | 3695 (38.2) |
|                                                  | <b>2014-2018</b> | 10028 (49.9)              | 5407 (51.8)  | 4621 (47.8) |

Abbreviations: PCR, protein-to-creatinine ratio; IQR: interquartile range; SD, standard deviation; ACE-I/ARB: angiotensin-converting enzyme inhibitor or angiotensin II receptor blocker; eGFR: estimated glomerular filtration rate

**Table S3. Characteristics of the patient cohort who received urine dipstick measurement**

| Patient characteristics                          | Overall       | Baseline use of ACE-I/ARB |              |
|--------------------------------------------------|---------------|---------------------------|--------------|
|                                                  |               | Yes                       | No           |
| <b>Total number, N</b>                           | 141914        | 39664                     | 102250       |
| <b>Urine dipstick measure, N (%)</b>             |               |                           |              |
| <b>"Negative"</b>                                | 118951 (83.8) | 31960 (80.6)              | 86991 (85.1) |
| <b>"+"</b>                                       | 19854 (14.0)  | 6489 (16.4)               | 13365 (13.1) |
| <b>"++ or above"</b>                             | 3109 (2.2)    | 1215 (3.1)                | 1894 (1.9)   |
| <b>Age, mean (SD), years</b>                     | 54.2 (17.7)   | 63.1 (13.9)               | 50.8 (17.8)  |
| <b>Systolic blood pressure, mean (SD), mmHg</b>  | 128 (17.1)    | 133 (17.8)                | 126 (16.4)   |
| <b>Potassium, mean (SD), mEq/L</b>               | 4.2 (0.4)     | 4.3 (0.4)                 | 4.2 (0.4)    |
| <b>eGFR, mean (SD), mL/min/1.73m<sup>2</sup></b> | 88 (23.9)     | 77 (22.9)                 | 92 (23.1)    |
| <b>Female sex, N (%)</b>                         | 78052 (55.0)  | 19322 (48.7)              | 58730 (57.4) |
| <b>Black race, N (%)</b>                         | 4850 (3.4)    | 1319 (3.3)                | 3531 (3.5)   |
| <b>Diabetes, N (%)</b>                           | 21701 (15.3)  | 13161 (33.2)              | 8540 (8.4)   |
| <b>Congestive heart failure, N (%)</b>           | 6059 (4.3)    | 3493 (8.8)                | 2566 (2.5)   |
| <b>Hypertension, N (%)</b>                       | 66597 (46.9)  | 36758 (92.7)              | 29839 (29.2) |
| <b>Myocardial infarction, N (%)</b>              | 4951 (3.5)    | 2876 (7.3)                | 2075 (2.0)   |
| <b>Thiazide diuretics, N (%)</b>                 | 21544 (15.2)  | 13582 (34.2)              | 7962 (7.8)   |
| <b>Calcium channel blockers, N (%)</b>           | 15446 (10.9)  | 8900 (22.4)               | 6546 (6.4)   |
| <b>Beta blockers, N (%)</b>                      | 30294 (21.4)  | 14998 (37.8)              | 15296 (15.0) |
| <b>Statin, N (%)</b>                             | 38297 (27.0)  | 20143 (50.8)              | 18154 (17.8) |
| <b>Calendar year, N (%)</b>                      |               |                           |              |
| <b>2004-2008</b>                                 | 35432 (25.0)  | 7437 (18.8)               | 27995 (27.4) |
| <b>2009-2013</b>                                 | 42547 (30.0)  | 12094 (30.5)              | 30453 (29.8) |
| <b>2014-2018</b>                                 | 63935 (45.1)  | 20133 (50.8)              | 43802 (42.8) |

Abbreviations: IQR: interquartile range; SD, standard deviation; ACE-I/ARB: angiotensin-converting enzyme inhibitor or angiotensin II receptor blocker; eGFR: estimated glomerular filtration rate

**Figure S1. Derivation of study cohort**

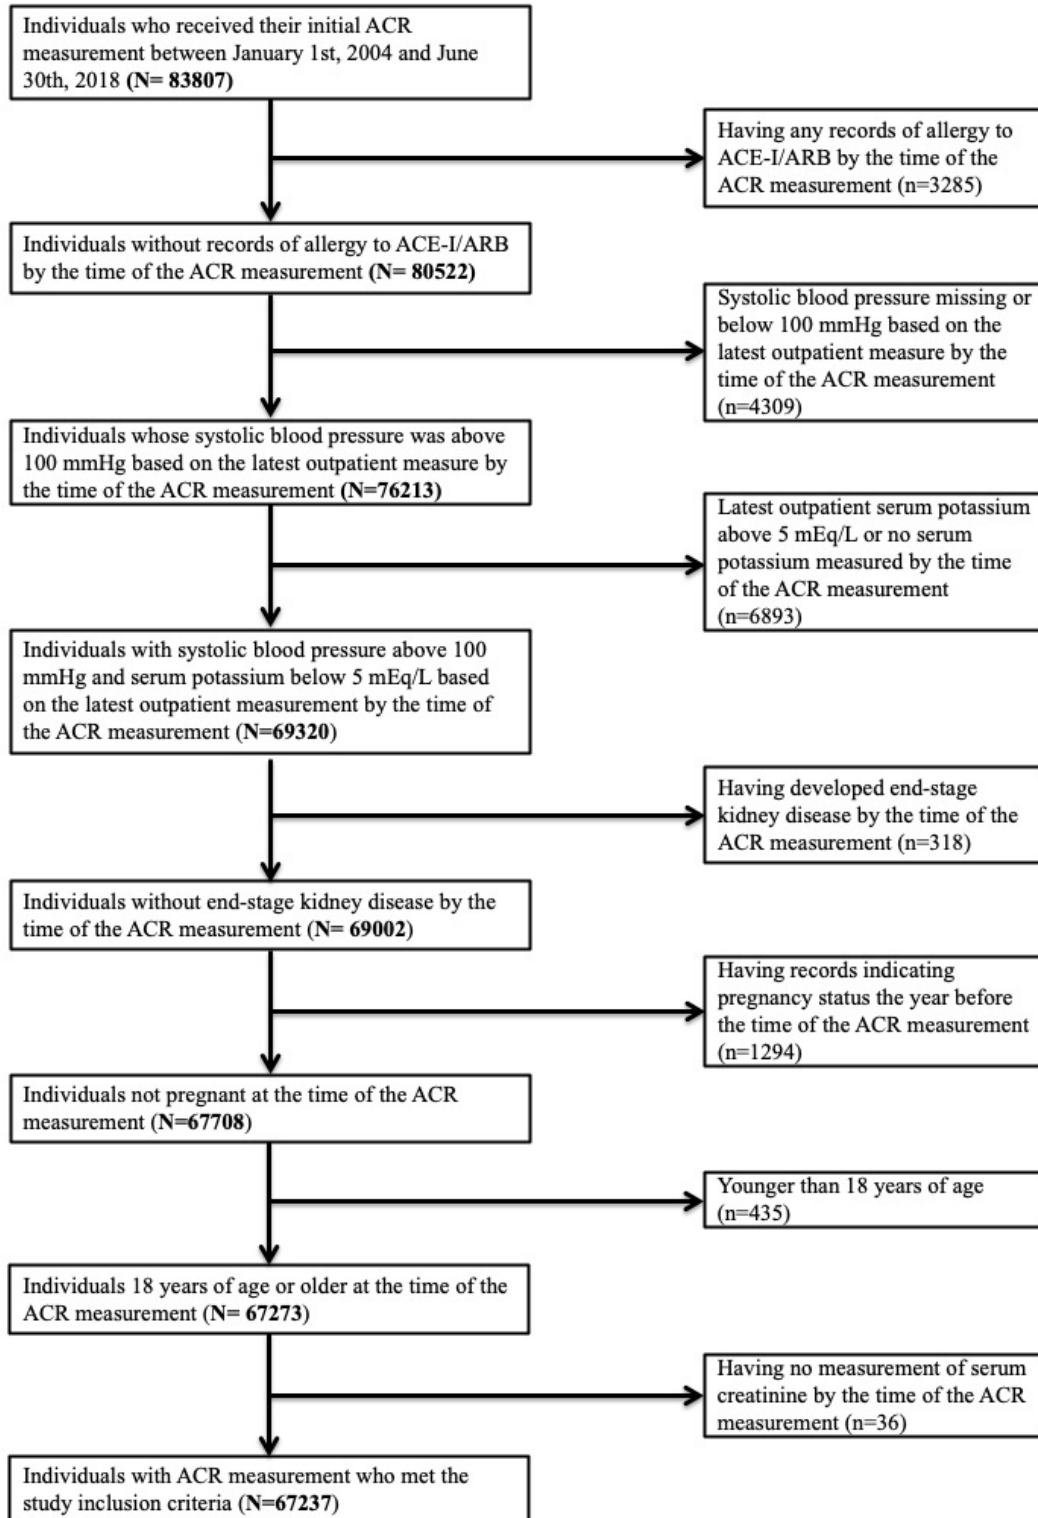

**Figure S2. Distribution of PCR stratified by ACE-I/ARB initiation within six months of the PCR test among individuals not on ACE-I/ARB at the time of the test (N=9,667), displayed on a log scale**

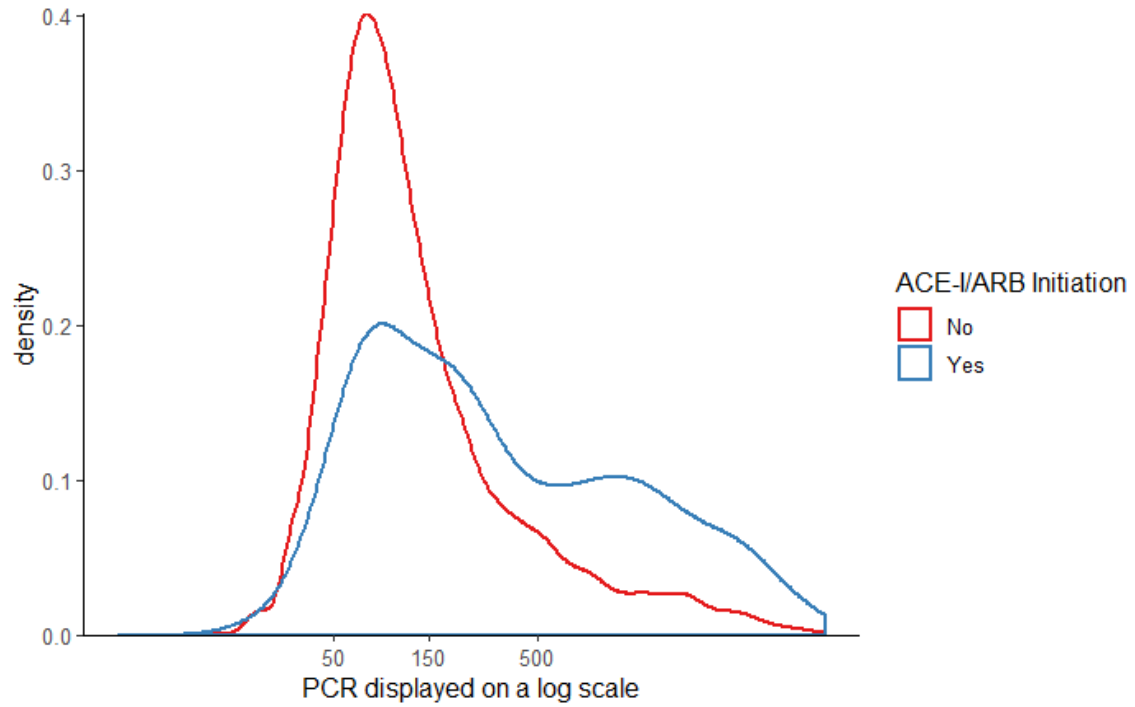

Abbreviations: PCR, protein-to-creatinine ratio; ACE-I/ARB: angiotensin-converting enzyme inhibitor or angiotensin II receptor blocker

**Figure S3. Association between PCR and initiation of ACE-I/ARB among individuals not on ACE-I/ARB at the time of the PCR test (N=9,667)**

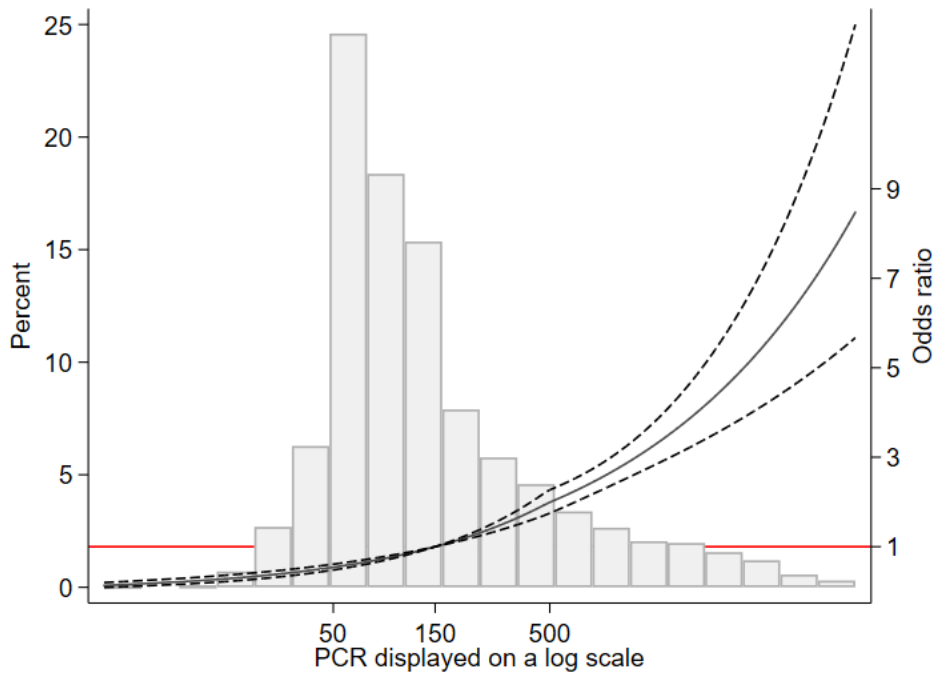

\*Reference point at PCR 150 mg/g; adjusted for baseline age, sex, race/ethnicity, calendar year, systolic blood pressure, serum potassium, estimated glomerular filtration rate, diabetes, congestive heart failure, myocardial infarction, hypertension, use of statin, thiazide, calcium channel blocker, and beta blocker.

Abbreviations: PCR, protein-to-creatinine ratio; ACE-I/ARB: angiotensin-converting enzyme inhibitor or angiotensin II receptor blocker
